# Supplementary material
Source: HighWire-hosted journal article supplement (https://erj.ersjournals.com/content/59/5/2101766)
Supplement: inline-supplementary-material-1 [file inline-supplementary-material-1.pdf]

## **Association of Early Life Factors and Prematurity-Associated Lung Disease: A Prospective Cohort Study**

<sup>1,2</sup>Kylie Hart, <sup>1,2</sup>Michael Cousins, <sup>1</sup>W John Watkins, <sup>1</sup>Sarah J Kotecha, <sup>3</sup>A John Henderson\*\*, <sup>1,2</sup>Sailesh Kotecha.

\*\*This publication is dedicated to our expert collaborator, valued mentor, and very dear late friend.

<sup>1</sup>Department of Child Health, Cardiff University School of Medicine, Cardiff, United Kingdom.

<sup>2</sup>Neonatal Unit, Cardiff and Vale University Health Board, Cardiff, United Kingdom.

<sup>3</sup>MRC Integrative Epidemiology Unit, Population Health Sciences, Bristol Medical School, University of Bristol, Bristol, United Kingdom.

Online Figure S1: CONSORT diagram of children invited to join the study

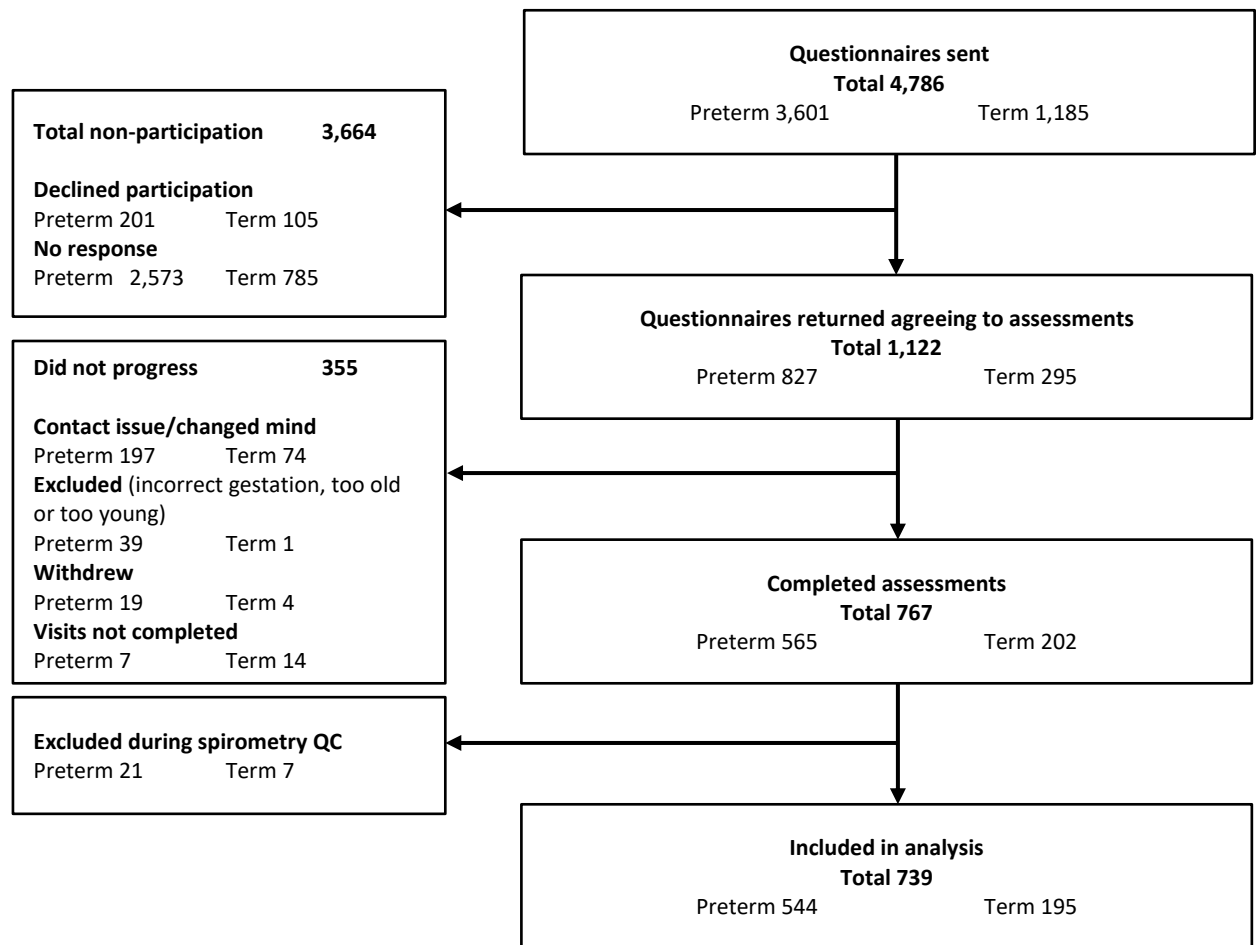

**Online Table S1: Comparison between the responders and non-responders' groups**

|                                                                                                                                                               | Preterm                     |                 | Terms                       |                |
|---------------------------------------------------------------------------------------------------------------------------------------------------------------|-----------------------------|-----------------|-----------------------------|----------------|
|                                                                                                                                                               | Responders                  | Non-responders  | Responders                  | Non-responders |
| <b>Subjects (n)</b>                                                                                                                                           | 565                         | 3036            | 202                         | 983            |
| Male                                                                                                                                                          | 293/565 (52%)               | 1679/3036 (55%) | 100/202 <sup>vv</sup> (50%) | 513/983 (52%)  |
| Gestational age (weeks) (mean SD)                                                                                                                             | 31.0 (2.7) <sup>vvv</sup>   | 31.6 (2.6)      | 39.8 (1.2) <sup>v</sup>     | 39.6 (1.3)     |
| Birthweight (g) (mean SD)                                                                                                                                     | 1703 (564) <sup>vvv</sup>   | 1828 (684)      | 3480 (479)                  | 3443 (507)     |
| WIMD 2019 (mean SD)                                                                                                                                           | 1062 (570) <sup>vvv</sup>   | 813 (583)       | 1192 (522) <sup>vv</sup>    | 1025 (558)     |
| 1 – most deprived                                                                                                                                             | 91/563 (16%) <sup>vvv</sup> | 850/2,731 (31%) | 16/198 (8%) <sup>vv</sup>   | 161/981 (16%)  |
| 2                                                                                                                                                             | 103/563 (18%)               | 615/2,731 (23%) | 28/198 (14%)                | 183/981 (19%)  |
| 3                                                                                                                                                             | 103/563 (18%)               | 420/2,731 (15%) | 41/198 (21%)                | 202/981 (21%)  |
| 4                                                                                                                                                             | 114/563 (20%)               | 362/2,731 (13%) | 44/198 (22%)                | 204/981 (21%)  |
| 5 – least deprived                                                                                                                                            | 152/563 (27%)               | 484/2,731 (18%) | 69/198 (35%)                | 231/981 (24%)  |
|                                                                                                                                                               |                             |                 |                             |                |
| Abbreviation: WIMD – Welsh Index of Multiple Deprivation.                                                                                                     |                             |                 |                             |                |
| Significance <sup>v</sup> p<0.05, <sup>vv</sup> p<0.01, <sup>vvv</sup> p<0.001 comparing the responders and non-responders in the preterm or the term groups. |                             |                 |                             |                |
| Number for responders are those who consented for a visit but before any QC.                                                                                  |                             |                 |                             |                |

**Online Table S2: Univariable analysis of BPD as a predictor of low lung function in the preterm-born population**

| Univariate analyses                   |       |                                      |              |
|---------------------------------------|-------|--------------------------------------|--------------|
| Factors                               | Beta  | Odds ratio (95% confidence interval) | Significance |
| No BPD (Ref)                          | -     | 1                                    | -            |
| Mild BPD                              | 0.701 | 2.016 (1.023, 3.971)                 | 0.043        |
| Moderate/Severe BPD                   | 0.732 | 2.080 (1.215, 3.561)                 | 0.008        |
| Beta value and Odds Ratios with 95%CI |       |                                      |              |

**Online Table S3: Multivariable modelling for low lung function in the preterm-born population**

| Model 1                                                                                                     |        |                                      |              |
|-------------------------------------------------------------------------------------------------------------|--------|--------------------------------------|--------------|
| Covariates                                                                                                  | Beta   | Standard error                       | Significance |
| Gestational age                                                                                             | -0.155 | 0.052                                | 0.003        |
|                                                                                                             |        |                                      |              |
| Factors                                                                                                     | Beta   | Odds ratio (95% confidence interval) | Significance |
| IUGR (ref = No)                                                                                             | 0.591  | 1.806 (1.069, 3.049)                 | 0.027        |
| Mild BPD (ref = No BPD)                                                                                     | 0.094  | 1.099 (0.493, 2.449)                 | 0.818        |
| Moderate/Severe BPD                                                                                         | -0.087 | 0.917 (0.439, 1.917)                 | 0.818        |
| Covariates presented as Beta value and SE. Beta value and Odds Ratios with 95%CI presented for all factors. |        |                                      |              |
